# Supplementary material for: In vitro effect of resin infiltrant on resistance of sound enamel surfaces in permanent teeth to demineralization
Source: PeerJ. 2021 Aug 13;9:e12008. doi: 10.7717/peerj.12008 (PMC8759355; doi:10.7717/peerj.12008)
Supplement: Supplemental Information 1 [file peerj-09-12008-s001.xlsx]

## Sheet: Sheet1
Eighty enamel blocks (4 mm × 4 mm × 2 mm) were obtained from healthy premolars, Specimens with baseline surface microhardness values of 320–370 g/µm2 and with the error within 20 g/µm2 between the five measurement points were selected
Serial number	Measurement site
	the central	left upper	left lower	right upper	right lower	mean	Whether to selected
1	367.3	338.6	358.4	344.7	351.3	352.06	yes
2	366.7	360.6	387.2	360.8	353.1	365.68	yes
3	336.1	350.5	345.2	351	344	345.36	yes
4	350.8	357.3	344.1	339.3	345.4	347.38	yes
5	319.5	328	335.6	314.1	313.2	322.08	no
6	357.8	349.3	357.1	345.2	334.5	348.78	yes
7	331.3	332	326.8	333.7	318.6	328.48	yes
8	350.7	346.6	341.2	356.6	348.78	348.776	yes
9	364.2	354	364.1	345.4	359	357.34	yes
10	365.9	346.6	365.7	353.3	335.2	353.34	yes
11	323.7	337.8	319.9	324.1	328.88	326.876	yes
12	332.1	345.2	325.3	325.2	331.95	331.95	yes
13	345.2	338.5	363.2	348.3	338.8	346.8	no
14	386.1	363.8	372.2	361.8	373.7	371.52	no
15	324.8	315	329.6	319.8	326.6	323.16	yes
16	318	328.3	323.3	309.1	315.2	318.78	no
17	356.4	337.7	352.5	325.6	340	342.44	no
18	343.2	361.5	340	367.2	350	352.38	no
19	359.5	349.5	362.4	347.1	337	351.1	yes
20	365.9	355.2	385.4	374.7	365.6	369.36	no
21	350.9	347.4	339.3	360.8	341.1	347.9	yes
22	335.9	365.2	365.4	354.7	365.6	357.36	yes
23	363.8	363.5	360.8	352.1	356.6	359.36	yes
24	357.2	332.3	344.1	344.7	355.5	346.76	yes
25	363.8	363.5	360.8	352.1	356.6	359.36	yes
26	377.1	344.1	347.3	347.7	356.8	354.6	no
27	352.1	351.1	337.8	358.4	332.9	346.46	yes
28	356.2	352.9	336.1	366.1	345,7	352.825	no
29	344.7	357.6	358.2	343.2	356.5	352.04	yes
30	352	378	357.2	350.5	354	358.34	no
31	349.6	350.2	344.7	344.1	358.6	349.44	yes
32	350	335.3	352.4	348.3	348.3	346.86	yes
33	320	322.5	347.8	346.1	343.4	335.96	yes
34	352	360.9	362	350.5	339.87	353.054	no
35	373.3	378.6	369.2	374.4	372.1	373.52	no
36	374.3	369.5	363.3	371.7	377.4	371.24	no
37	342.6	350.1	332.7	337.5	323.1	337.2	yes
38	344	331.3	358.4	348.3	348.3	346.06	no
39	349.3	360.6	359.4	347.7	353.3	354.06	yes
40	334.6	350.1	332.7	337.5	331.1	337.2	yes
41	330.5	344.4	334.6	343.3	334.3	337.42	yes
42	340.7	337.7	353	350.1	343.5	345	yes
43	370.7	389.4	382	384.5	387	382.72	no
44	349.6	350.2	344.7	324.1	358.6	345.44	no
45	360.9	356.6	357.1	362	356.2	358.56	yes
46	366.1	363.8	352.2	347.8	353.7	356.72	yes
47	336.3	340.6	347	335.8	340.5	340.04	yes
48	306.2	336.3	328.5	320.4	320.9	322.46	no
49	328	310.5	345.8	344.1	341.4	333.96	no
50	332	341	332.9	334.5	325.8	333.24	yes
51	350.9	347.4	349.3	360.8	341.1	349.9	yes
52	350.8	357.3	344.1	339.3	345.4	347.38	yes
53	342	351	342.9	334.5	325.8	339.24	yes
54	356.7	352.1	346.1	357.1	355.9	353.58	yes
55	344.7	357.6	348.2	353.2	356.5	352.04	yes
56	347.8	349.3	347.1	345.2	354.5	348.78	yes
57	336.7	312.3	323.5	276.7	350.7	319.98	no
58	332.1	334.5	345.2	345.3	329.2	337.26	yes
59	319.5	328	325.6	314.1	303.2	318.08	yes
60	335.2	332.9	331.1	329.5	342.9	334.32	yes
61	345.3	359.1	343	354.7	331.5	346.72	yes
62	331.3	332	326.8	333.7	318.6	328.48	yes
63	364.2	354	354.1	345.4	359	355.34	yes
64	343.7	307.8	291.7	319.9	344.1	321.44	no
65	350.9	336.6	367.1	352	346.2	350.56	yes
66	347.2	342.3	344.1	334.7	335.5	340.76	yes
67	346.7	352.1	366.1	347.1	355.9	353.58	yes
68	332.9	332.9	293	341.4	292.1	318.46	no
69	365.3	369.1	363	354.7	361.5	362.72	yes
70	333.3	378.6	399.2	384.4	372.1	373.52	no
71	355.9	346.6	345.7	353.3	355.2	351.34	yes
72	342.1	351.1	347.8	353.4	338.9	346.66	yes
73	374.3	369.5	363.3	371.7	377.4	371.24	no
74	386.7	360.6	367.2	360.8	353.1	365.68	yes
75	336.1	350.5	345.2	341	354	345.36	yes
76	310.5	324.4	284.6	333.3	334.3	317.42	no
77	304.8	315	309.6	359.7	326.6	323.14	no
78	336.3	340.6	347	335.8	340.5	340.04	yes
79	332.9	332.9	335.7	341.4	335.76	335.732	yes
80	298	338.3	353.3	309.1	305.2	320.78	no
Finally, Fifty six enamel blocks were selected, and twenty four enamel blocks were excluded.
Randomly select twenty enamel blocks from the included fifty six enamel blocks as the experimental group and the control group	Serial number	Initial microhardness value						The experimental group was measured the microhardness value again after treated with resin infiltrant						Measure the microhardness value again after manual demineralization						Measuring the depth of demineralization after dyeing with Rhodamine B
		Measurement site					mean	Measurement site					mean	Measurement site					mean	five measurements					mean
		the central	left upper	left lower	right upper	right lower		the central	left upper	left lower	right upper	right lower		the central	left upper	left lower	right upper	right lower		one	two	three	four	five
experimental group	1	367.3	338.6	358.4	344.7	351.3	352.06	364.1	344.5	361.5	349.7	367.45	357.45	327.7	326.2	328.9	300.7	307	318.1	104.88	122.405	122.453	123.524	117.917	118.236
	8	350.7	346.6	341.2	356.6	348.78	348.776	337.9	349.8	349.5	354.07	354.03	349.06	278.7	303.9	264.3	285.1	312.3	288.86	53.178	55.23	61.379	58.212	60.073	57.6144
	21	350.9	347.4	339.3	360.8	341.1	347.9	350.9	349.3	351.1	342.7	361	351	304.1	332.5	319.9	301.8	351	321.86	114.306	122.858	119.101	128.429	128.807	122.7
	31	349.6	350.2	344.7	344.1	358.6	349.44	347.6	371.9	339.5	365.7	356.15	356.17	319.5	324.1	344.1	304.7	310.975	320.675	104.872	119.055	129.5	123.882	119.421	119.346
	32	350	335.3	352.4	348.3	348.3	346.86	339.1	344.9	358.6	361.7	326.075	346.075	304.3	303.8	316.3	328.3	302.3	311	105.595	90.296	112.326	102.609	117.539	105.673
	33	320	322.5	347.8	346.1	343.4	335.96	331.1	350.7	310.7	344.8	334.325	334.325	309.6	290.2	298.5	278.8	302.525	295.925	79.159	80.968	89.588	99.254	107.087	91.2112
	37	342.6	350.1	332.7	337.5	323.1	337.2	341	319	323.5	345.8	332.325	332.325	284.6	297.6	303.5	293.7	329.475	301.775	111.565	111.937	106.062	122.014	117.912	113.898
	53	342	351	342.9	334.5	325.8	339.24	357.3	369.8	332.5	358.4	329.5	349.5	324.8	284.4	285.4	300.5	304.38	299.896	88.816	92.162	97.42	86.212	95.147	91.9514
	65	350.9	336.6	367.1	352	346.2	350.56	366.1	348.1	376.2	349.1	347.375	357.375	307.3	308.7	273.1	324.9	256.87	294.174	84.712	88.842	89.18	100.743	112.693	95.234
	78	336.3	340.6	347	335.8	340.5	340.04	324.6	340.4	326.5	354.6	329.025	335.025	270.6	283.9	296.7	272.5	316.3	288	45.521	53.357	58.958	76.505	81.714	63.211
control group	2	366.7	360.6	387.2	360.8	353.1	365.68	No treatment in the control group.						286.7	238.1	305.1	277.6	295.3	280.56	73.11	68.132	71.978	31.319	37.928	56.4934
	3	336.1	350.5	345.2	351	344	345.36							238.4	262.1	253.1	244.2	262.6	252.08	48.464	40.663	38.497	37.427	38.603	40.7308
	10	365.9	346.6	365.7	353.3	335.2	353.34							278.7	208.6	264.3	278.2	256.3	257.22	50.576	45.068	40.11	45.634	37.916	43.8608
	27	352.1	351.1	337.8	358.4	332.9	346.46							267.1	253.1	231.6	256.2	230.9	247.78	45.618	41.791	39.011	34.655	29.675	38.15
	24	357.2	332.3	344.1	344.7	355.5	346.76							242.2	265.7	245.7	236.6	265.9	251.22	51.66	52.244	49.499	45.068	44.505	48.5952
	25	363.8	363.5	360.8	352.1	356.6	359.36							320.4	332.1	310.1	320.8	345.9	325.86	62.546	66.941	77.37	64.727	72.434	68.8036
	41	330.5	344.4	334.6	343.3	334.3	337.42							204.9	182.3	222.1	206.6	215.7	206.32	23.083	23.077	30.225	35.719	29.675	28.3558
	54	356.7	352.1	346.1	357.1	355.9	353.58							278.8	212.8	242.2	275.7	212.9	244.48	36.813	43.41	59.343	42.889	32.985	43.088
	61	345.3	359.1	343	354.7	331.5	346.72							269	312.7	324.6	274.9	273.7	290.98	65.971	76.382	71.978	71.997	62.64	69.7936
	79	332.9	332.9	335.7	341.4	335.76	335.732							317.1	297.1	301.7	312.9	290.8	303.92	61.505	70.222	66.382	71.321	63.626	66.6112
In addition, randomly select ten enamel blocks from the included fifty six enamel blocks for double-fluorescence staining
Measuring the depth of penetration after dyeing
	five measurements					mean
Serial number	one	two	three	four	five
6	24.691	52.501	50.514	39.257	37.583	40.9092
12	18.745	16.46	18.728	31.641	38.144	24.7436
22	11.885	12.95	12.553	15.631	15.589	13.7216
45	17.507	14.829	24.761	28.137	22.056	21.458
46	45.24	36.193	42.301	33.859	38.314	39.1814
59	26.191	21.938	33.202	38.269	29.149	29.7498
62	45.812	27.819	31.55	44.031	31.696	36.1816
67	44.008	40.791	44.61	33.849	27.466	38.1448
69	37.69	37.918	35.131	36.74	36.363	36.7684
74	35.082	34.146	35.375	35.117	37.521	35.4482
In addition, a total of twenty one enamel blocks were used for scanning electron microscopy. The remaining excess enamel block is used to supplement the loss of enamel block during the experiment.
